# Supplementary material for: The mitochondrial NADH shuttle system is a targetable vulnerability for Group 3 medulloblastoma in a hypoxic microenvironment
Source: PubMed Central journal article supplement (PMC10689432; doi:10.1038/s41419-023-06275-0), 2023-11-30

Suppl. Figure 1C

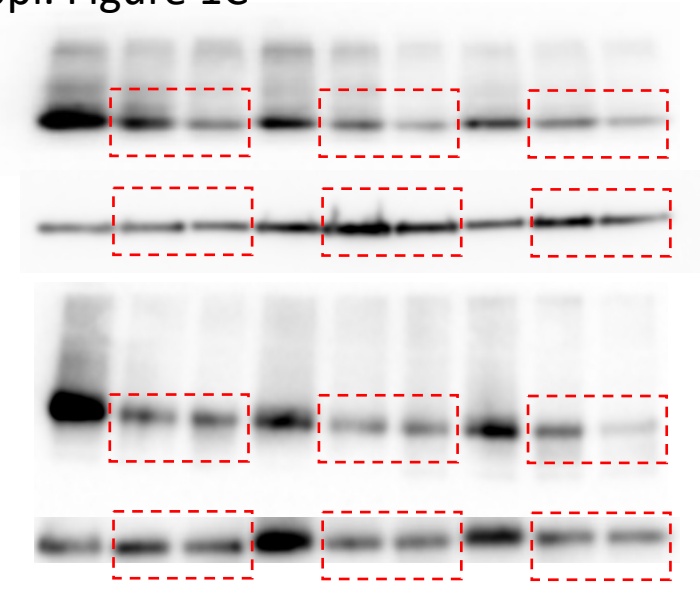

Suppl. Figure 1D

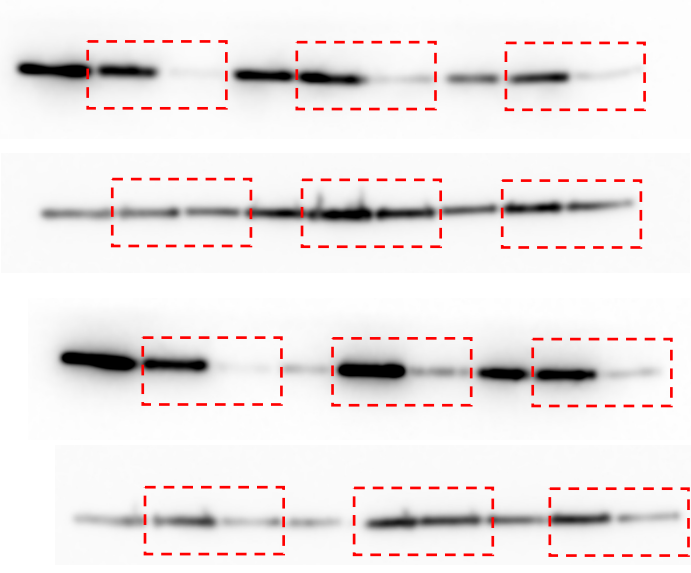

Supplement: 41419_2023_6275_MOESM3_ESM.pdf [file 41419_2023_6275_MOESM3_ESM.pdf]
