# Supplementary material for: The mitochondrial NADH shuttle system is a targetable vulnerability for Group 3 medulloblastoma in a hypoxic microenvironment
Source: PubMed Central journal article supplement (PMC10689432; doi:10.1038/s41419-023-06275-0), 2023-11-30

**A**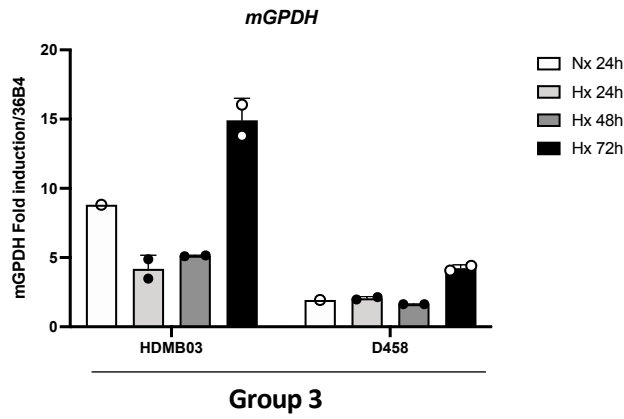**B**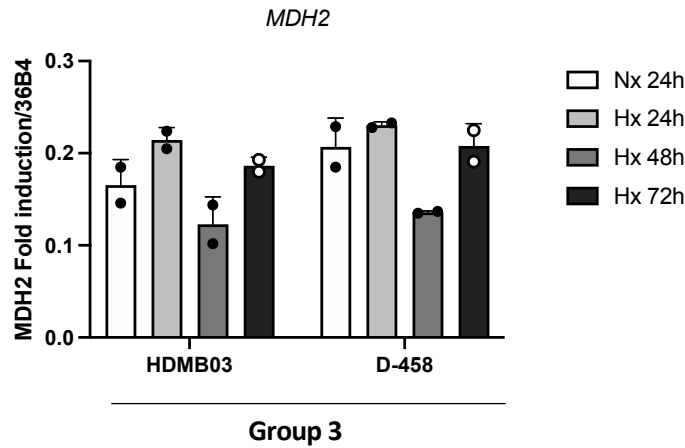**C**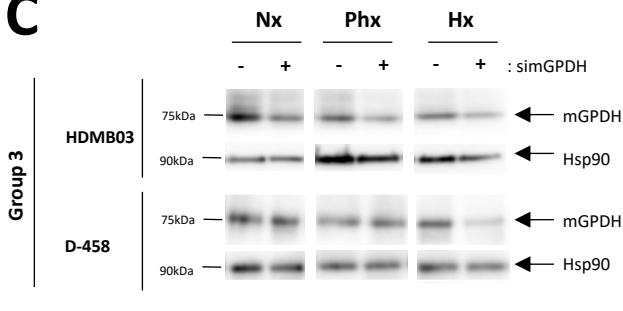**mGPDH**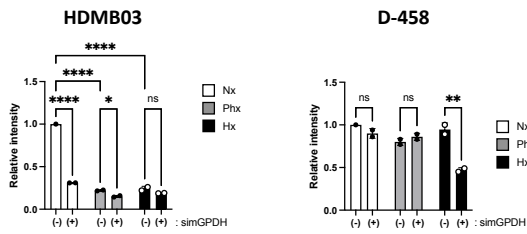**D**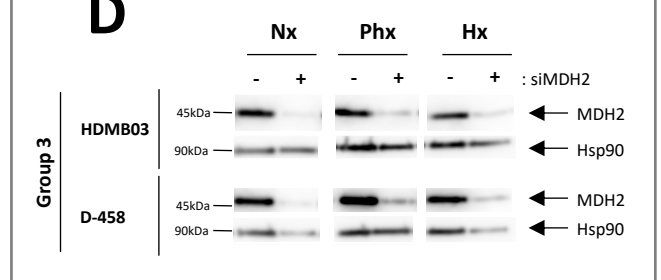**MDH2**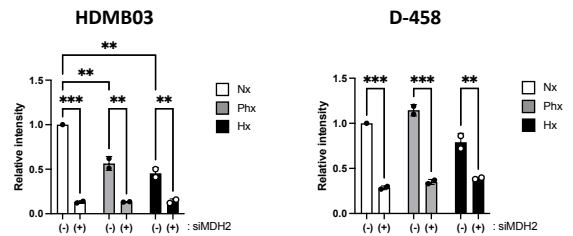

Supplement: 41419_2023_6275_MOESM4_ESM.pdf [file 41419_2023_6275_MOESM4_ESM.pdf]
